# Supplementary material for: Neck Disability Index Detects Higher Neck-Related Disability Levels among Physiotherapists and Family Medicine Specialists than among Dentists
Source: MDPI journal article supplement (doi:10.3390/healthcare11040581), 2023-02-15
Supplement: s1 [file s1]

## Flow Diagram

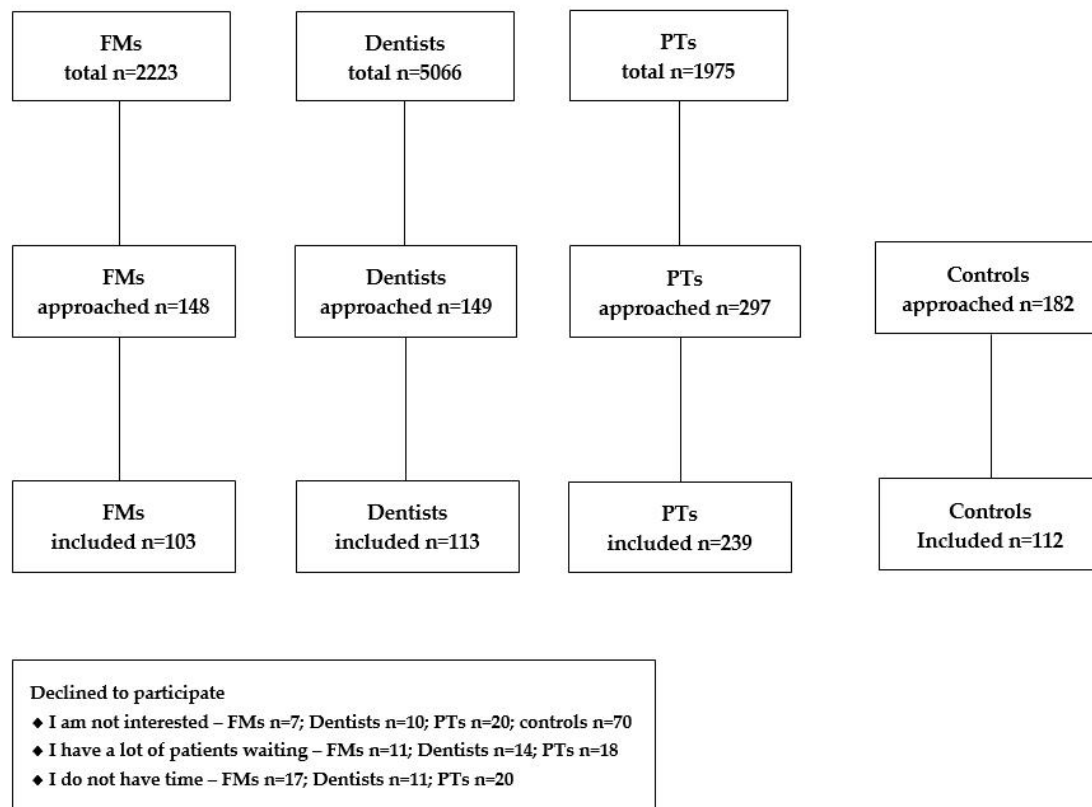

Figure S1. Flowchart of the study. FMs-family medicine specialists, PTs-physiotherapists, control-control population, dentists. Total number representing approximate number of medical professionals in Croatia in the last five years
